# Supplementary material for: Pathogenic PSEN1 Glu184Gly Mutation in a Family from Thailand with Probable Autosomal Dominant Early Onset Alzheimer’s Disease
Source: PubMed Central journal article supplement (PMC7151116; doi:10.3390/diagnostics10030135), 2020-03-01
Supplement: diagnostics-10-00135-s001.pdf [file diagnostics-10-00135-s001.pdf]

**Supplementary table 1. : List of variants, found by the targeted NGS analysis.**

| Chromosome | Gene      | Location  | Mutation  | RsID         | SIFT  | Polyphen2 | 1000Genomes | ExAC    |          |          |
|------------|-----------|-----------|-----------|--------------|-------|-----------|-------------|---------|----------|----------|
| 1          | CR1       | c.4973A>G | p.H1658R  | rs2274567    | 0.897 | T         | 0.168       | B       | 2.23E-01 | 2.58E-01 |
|            |           | c.6178A>T | p.T2060S  | rs4844609    | 0.804 | T         | 0           | B       | 0.9922   | 9.85E-01 |
|            |           | c.6193A>G | p.I2065V  | rs6691117    | 1     | T         | 0           | B       | 0.38919  | 3.27E-01 |
|            |           | c.6830C>G | p.P2277R  | rs3811381    | 0.446 | T         | 0.032       | B       | 0,0.1964 | 2.40E-01 |
|            |           | c.7255A>G | p.T2419A  | rs2296160    | 0.987 | T         | 0.001       | B       | 0.78846  | 8.08E-01 |
| 2          | ALS2      | c.1102G>A | p.V368M   | rs3219156    | 0.191 | T         | 0.009       | B       | 0.8983   | 9.10E-01 |
| 5          | CSF1R     | c.1085A>G | p.H362R   | rs10079250   | 0.061 | T         | 0.157       | B       | 0.1575   | 4.89E-02 |
| 10         | OPTN      | c.293T>A  | p.M98K    | rs11258194   | 0.925 | T         | 0.004       | B       | 0.0677   | 4.49E-02 |
|            |           | c.964G>A  | p.E322K   | rs523747     | 1     | T         | 0           | B       | 9.91E-01 | 9.97E-01 |
|            | CTNNA3    | c.1787G>A | p.S596N   | rs4548513    | 1     | T         | 0.001       | B       | 0.4725   | 4.12E-01 |
|            | BACE1     | c.1385A>G | p.N462S   | rs539765     | 1     | T         | 0           | B       | 1        | 1.00E+00 |
| 11         | SORL1     | c.3220G>C | p.E1074Q  | rs1699107    | 0     | T         | 0           | B       | 0.9885   | 9.95E-01 |
|            |           | c.5899A>G | p.I1967V  | rs1792120    | 1     | T         | 0.003       | B       | 0.9853   | 9.95E-01 |
|            | LRP6      | c.3184G>A | p.V1062I  | rs2302685    | 1     | T         | 0           | B       | 0.8777   | 8.47E-01 |
| 12         | LRRK2     | c.149A>G  | p.H50N    | rs2256408    | 1     | T         | 0           | B       | 0.9739   | 9.91E-01 |
|            |           | c.4939T>A | p.1647T   | rs11564148   | 0.953 | T         | 0           | B       | 0.2751   | 2.96E-01 |
|            |           | c.7190T>C | p.M2397T  | rs3761863    | 0.466 | T         | 0           | B       | 0.54945  | 6.17E-01 |
| 14         | PSEN1     | c.551A>G  | p.E184G   | rs1566641934 | 0.005 | D         | 0.733       | P       | NA       | NA       |
| 15         | SPG11     | c.833A>G  | p.N278S   | rs75309308   | 0.487 | T         | 0.01        | B       | 0.0201   | 7.76E-03 |
| 17         | MAPT      | c.1321T>C | p.Y441H   | rs2258689    | 0.978 | T         | 0.001       | B       | 3.24E-01 | 2.75E-01 |
| 19         | ABCA7     | c.955A>G  | p.T319A   | rs3752232    | 0.882 | T         | 0.001       | B       | 0.1011   | 5.99E-02 |
|            |           | c.1184A>G | p.H395R   | rs3764647    | 1     | T         | 0.002       | B       | 0.09706  | 5.76E-02 |
|            |           | c.1185C>G | p.H395Q   | rs3764647    | 0.704 | T         | 0.007       | B       | 0.108826 | 6.30E-02 |
|            |           | c.1388G>A | p.R463H   | rs3752233    | 0.254 | T         | 0.796       | P       | 0.0590   | 4.70E-02 |
|            |           | c.2153A>C | p.N718T   | rs3752239    | 0.239 | T         | 0.182       | B       | 0.0581   | 4.58E-02 |
|            |           | c.4580G>C | p.G1527A  | rs3752246    | 0.877 | T         | 0           | B       | 0.8237   | 8.38E-01 |
|            | c.5057A>G | p.Q1686R  | rs4147918 | 0.234        | T     | 0.004     | B           | 0.05586 | 4.78E-02 |          |
|            | NOTCH3    | c.6668C>T | p.A2223V  | rs1044009    | 0.175 | T         | 0.003       | B       | 0.6309   | 6.94E-01 |
|            | CD33      | c.205A>G  | p.R69G    | rs2455069    | 0.335 | T         | 0.003       | B       | 0.3489   | 3.58E-01 |
| 20         | PRNP      | c.385A>G  | p.M129V   | rs1799990    | 0.024 | D         | 0.012       | B       | 0.2637   | 3.07E-01 |
